# Supplementary material for: Three-dimensional porous MoNi4 networks constructed by nanosheets as bifunctional electrocatalysts for overall water splitting
Source: Royal Society of Chemistry journal article supplement (doi:10.1039/c6ta10802d), 2017-01-01
Supplement: c6ta10802d1.pdf [file c6ta10802d1.pdf]

## Supplementary Information

### **Three-Dimensional Porous MoNi<sub>4</sub> Networks Constructed by Nanosheets as Bifunctional Electrocatalysts for Overall Water Splitting**

Yanshuo Jin<sup>a</sup>, Xin Yue<sup>a</sup>, Chang Shu<sup>a</sup>, Shangli Huang<sup>b</sup>, Pei Kang Shen<sup>a,b,\*</sup>

<sup>a</sup>State Key Laboratory of Optoelectronic Materials and Technologies, School of Materials Science and Engineering, Sun Yat-sen University, Guangzhou 510275, P. R. China

<sup>b</sup>Collaborative Innovation Center of Sustainable Energy Materials, Guangxi University, Nanning 530004, P. R. China

\*E-mail: [stssp@mail.sysu.edu.cn](mailto:stssp@mail.sysu.edu.cn)

**Table S1.** HER, OER and overall water splitting activities of the porous MoNi<sub>4</sub> networks and reported catalysts.

| Catalyst (mass loading)                                                                            | Electrolyte                          | HER Potential vs. RHE (V) @ 10 mA cm <sup>-2</sup> | OER Potential vs. RHE (V) @ 10 mA cm <sup>-2</sup> | Overall Water Splitting Potential (V) @ 10 mA cm <sup>-2</sup> | Overall Water Splitting Onset Potential (V) |
|----------------------------------------------------------------------------------------------------|--------------------------------------|----------------------------------------------------|----------------------------------------------------|----------------------------------------------------------------|---------------------------------------------|
| porous MoNi <sub>4</sub> networks (~1.09 mg/cm <sup>2</sup> )                                      | 1 M KOH                              | -0.028                                             | 1.51                                               | 1.58                                                           | 1.45 <sup>this work</sup>                   |
| NiCo <sub>2</sub> O <sub>4</sub> hollow microcuboids <sup>[1]</sup> (~1 mg/cm <sup>2</sup> )       | 1 M KOH                              | -0.110                                             | 1.52                                               | 1.65                                                           |                                             |
| NiSe nanowire film/Ni foam <sup>[2]</sup> (2.8 mg/cm <sup>2</sup> )                                | 1 M KOH                              | -0.096                                             |                                                    | 1.63                                                           | ~1.5                                        |
| Ni <sub>5</sub> P <sub>4</sub> Films/Ni foil <sup>[3]</sup> (~3.5 mg/cm <sup>2</sup> )             | 1 M KOH                              | -0.15                                              | 1.56                                               | <1.7                                                           | ~1.53                                       |
| Ni <sub>2</sub> P nanoparticles <sup>[4]</sup> (0.14 mg/cm <sup>2</sup> )                          | 1 M KOH                              |                                                    | 1.52                                               | 1.63                                                           | ~1.5                                        |
| Co-P films/Cu foil <sup>[5]</sup> (2.71 mg/cm <sup>2</sup> )                                       | 1 M KOH                              | -0.094                                             | 1.575                                              | 1.64                                                           | 1.57                                        |
| Porous Cobalt-Based Thin Film <sup>[6]</sup> (~0.1 mg/cm <sup>2</sup> )                            | 1 M KOH                              | -0.38                                              | 1.53                                               |                                                                |                                             |
|                                                                                                    | 0.5 M H <sub>2</sub> SO <sub>4</sub> | -0.15                                              |                                                    |                                                                |                                             |
| Ni <sub>3</sub> S <sub>2</sub> Nanosheet Arrays /Ni foam <sup>[7]</sup> (~1.6 mg/cm <sup>2</sup> ) | 1 M KOH                              | ~-0.22                                             | ~1.49                                              | ~1.76(@ ~13 mA cm <sup>-2</sup> )                              |                                             |
|                                                                                                    | neutral media                        | ~-0.17                                             |                                                    |                                                                |                                             |

|                                                                                                                      |        |        |      |                                          |      |
|----------------------------------------------------------------------------------------------------------------------|--------|--------|------|------------------------------------------|------|
| NiFeO <sub>x</sub> /CFP<br>after two lithium<br>galvanostatic<br>cycles <sup>[8]</sup><br>(~1.6 mg/cm <sup>2</sup> ) | 1M KOH | -0.088 | 1.46 | 1.55                                     | ~1.5 |
|                                                                                                                      |        |        |      | 1.51<br>(increasing the<br>mass loading) |      |

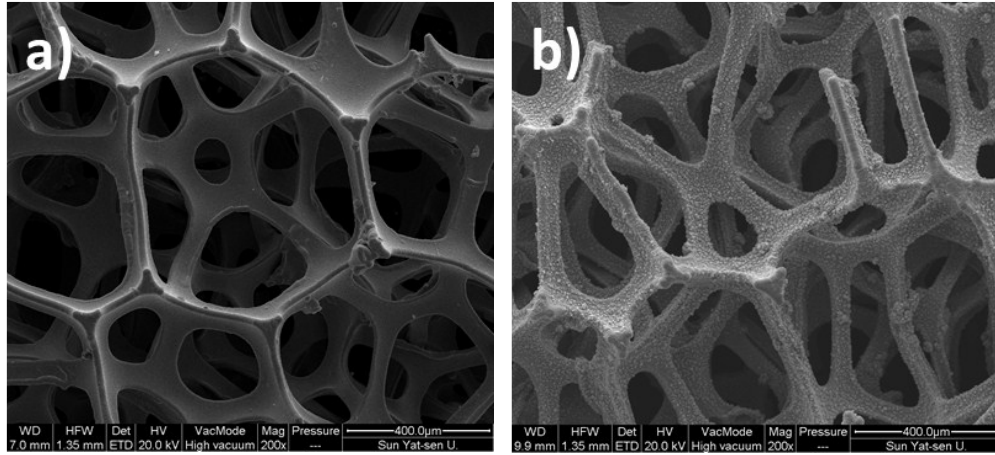

**Figure S1.** SEM images of (a) nickel foam, (b) porous MoNi<sub>4</sub> networks annealed at 450°C at low magnification.

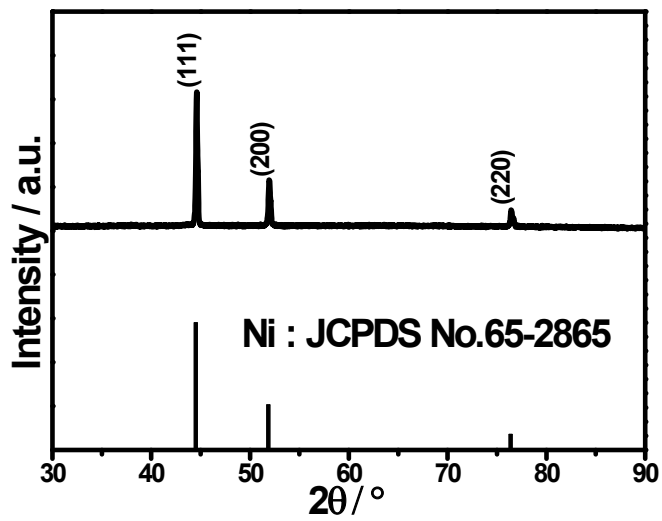

**Figure S2.** XRD patterns of nickel foam.

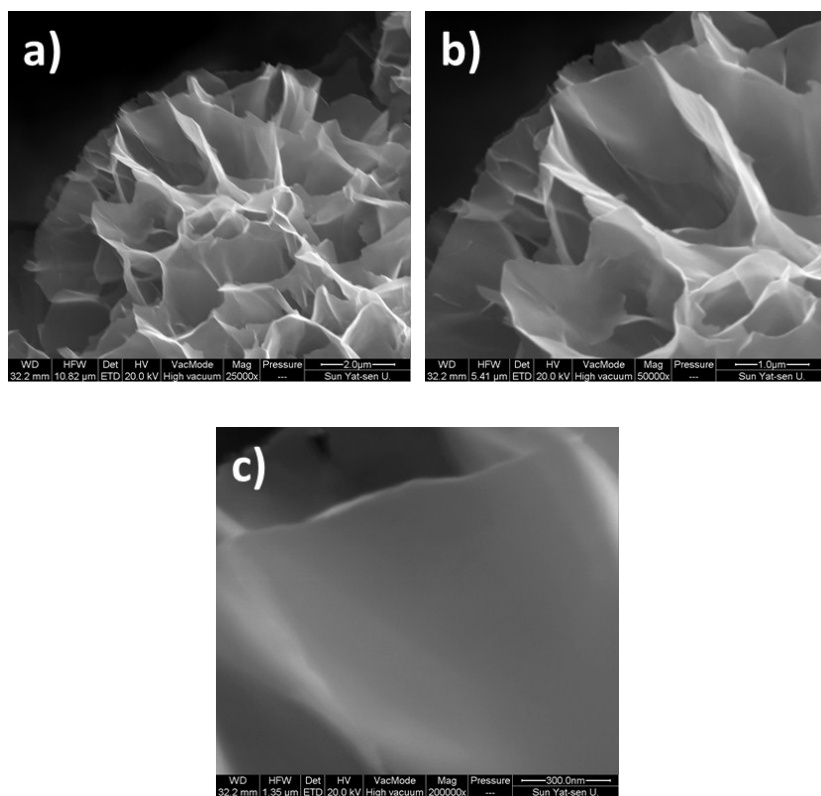

**Figure S3.** SEM images of Mo-Ni based precursors at different magnifications.

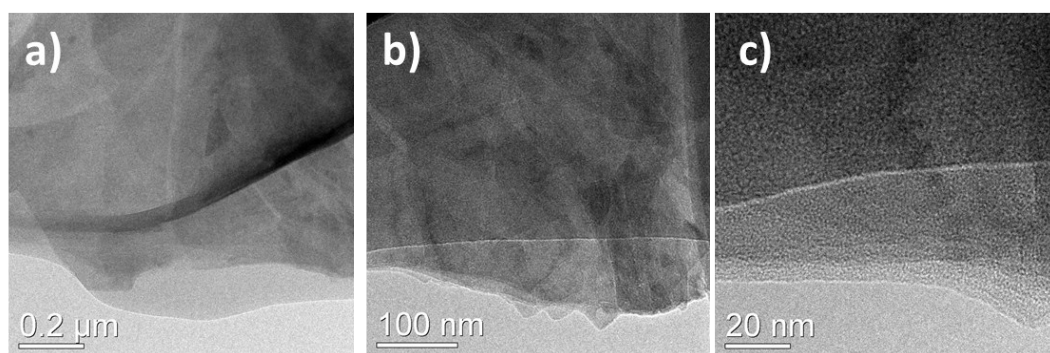

**Figure S4.** TEM images of Mo-Ni based precursors at different magnifications.

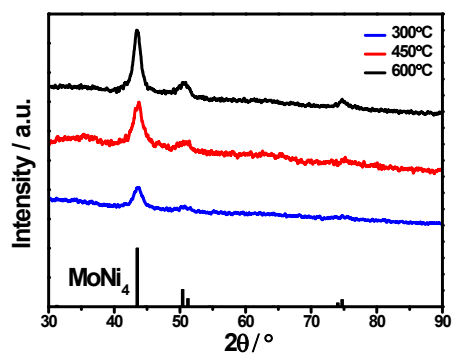

**Figure S5.** XRD patterns of the porous MoNi<sub>4</sub> networks annealed at 300°C, 450°C and 600°C.

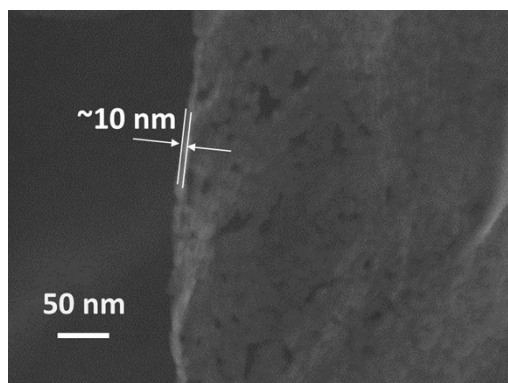

**Figure S6.** Higher resolution SEM image of the porous MoNi<sub>4</sub> networks annealed at 450°C.

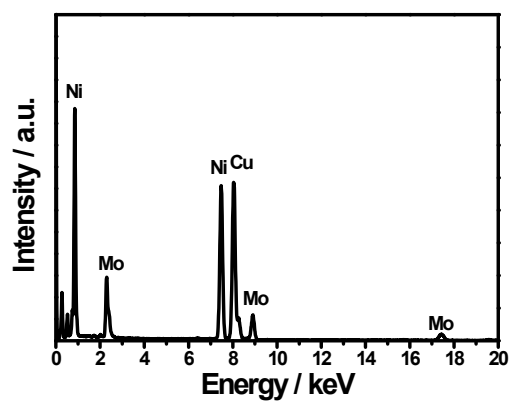

**Figure S7.** The corresponding energy dispersive X-ray (EDX) spectrum of porous MoNi<sub>4</sub> networks annealed at 450°C.

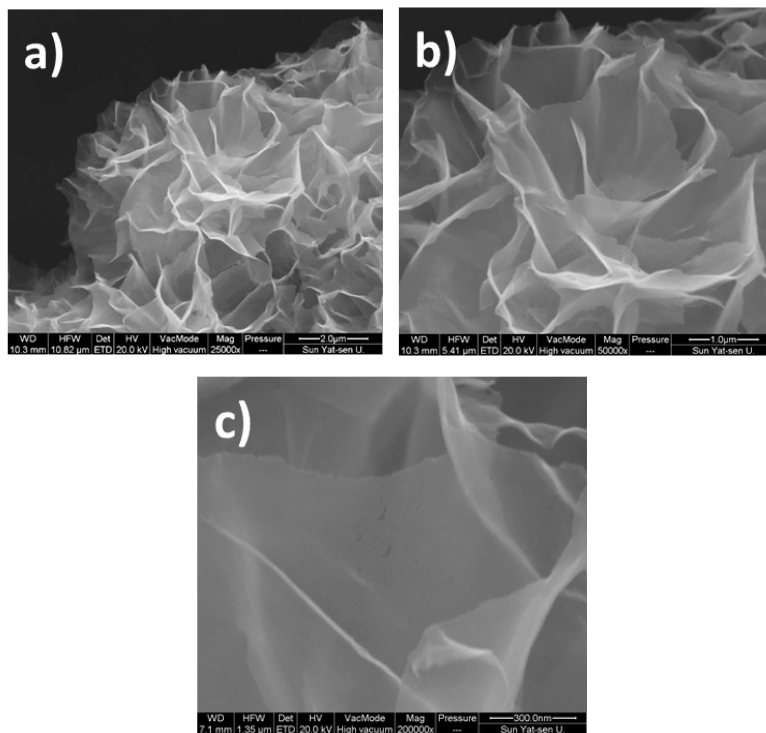

**Figure S8.** SEM images of porous MoNi<sub>4</sub> networks annealed at 300°C at different magnifications.

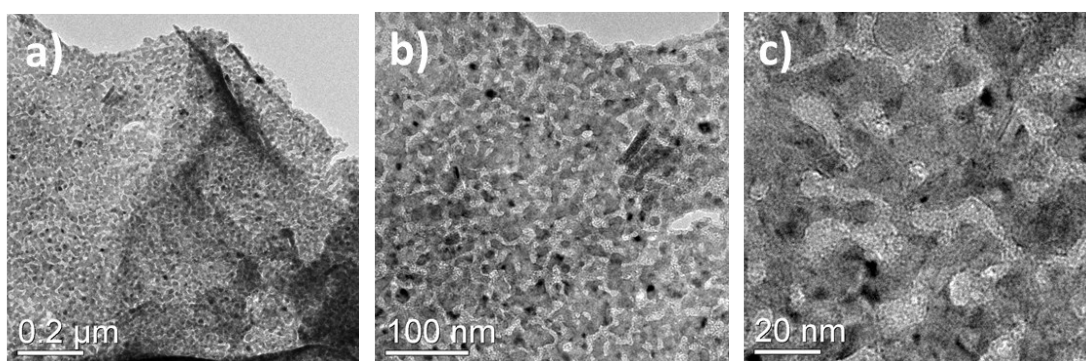

**Figure S9.** TEM images of porous MoNi<sub>4</sub> networks annealed at 300°C at different magnifications.

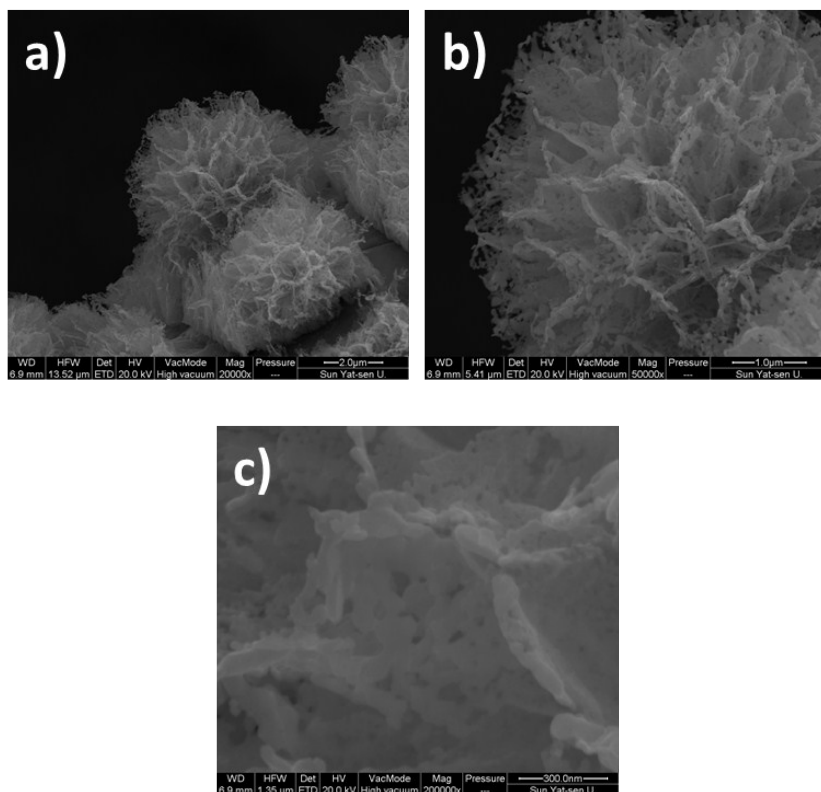

**Figure S10.** SEM images of porous MoNi<sub>4</sub> networks annealed at 600°C at different magnifications.

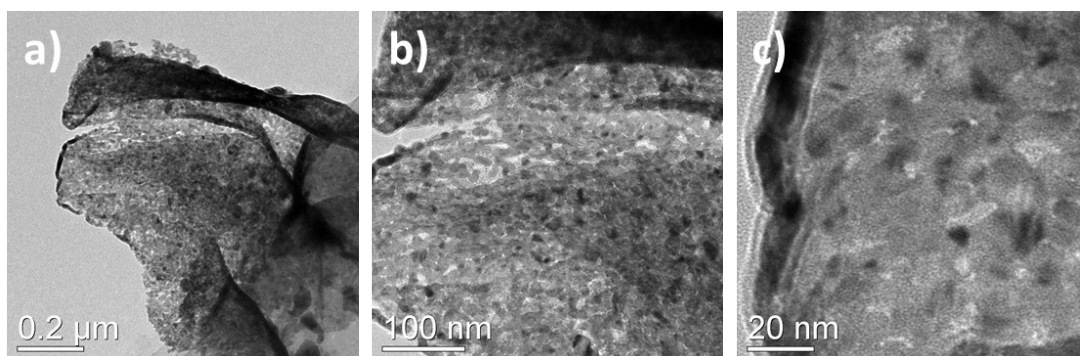

**Figure S11.** TEM images of porous MoNi<sub>4</sub> networks annealed at 600°C at different magnifications.



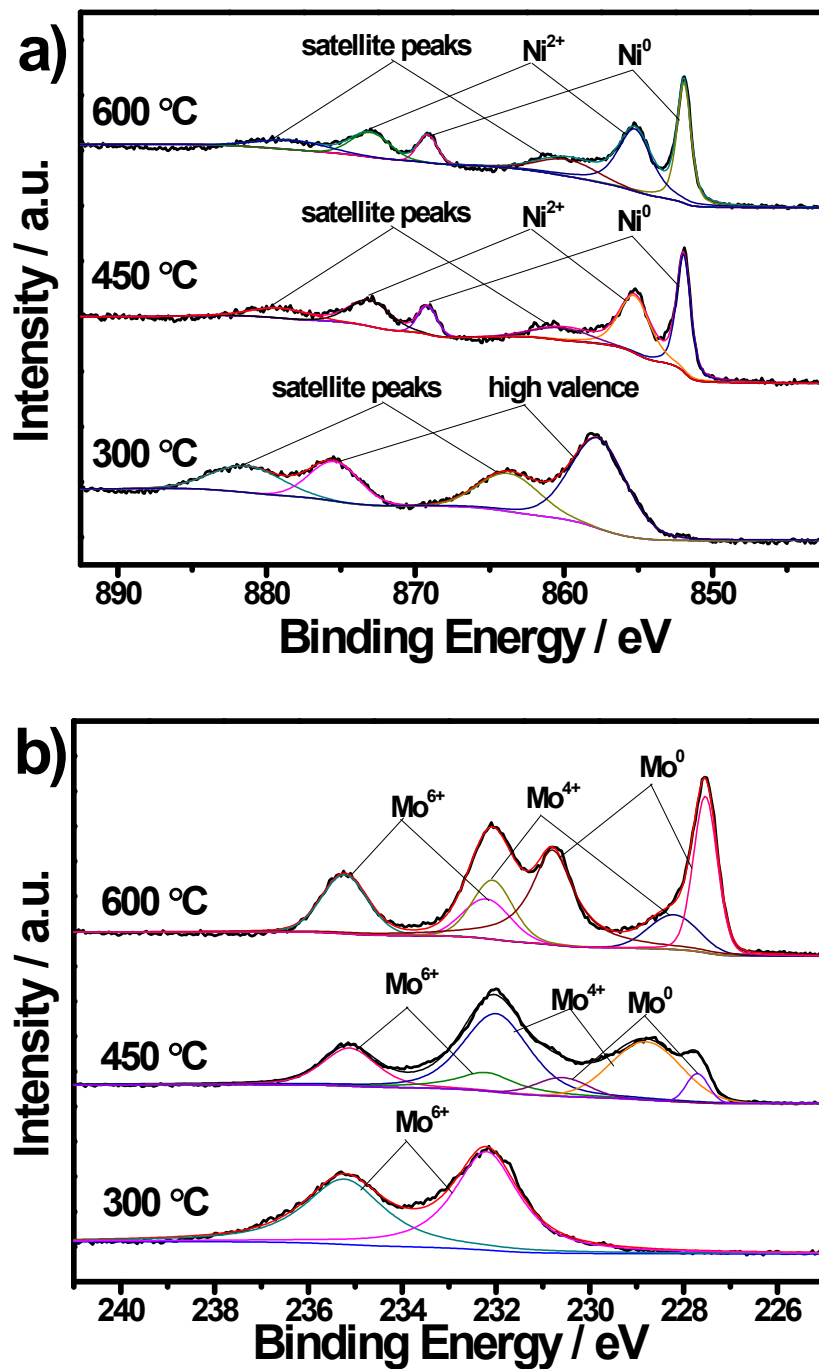

Figure S12. XPS spectra of the MoNi<sub>4</sub> networks annealed at different temperature. (a)

Ni 2p peaks. (b) Mo 3d peaks.

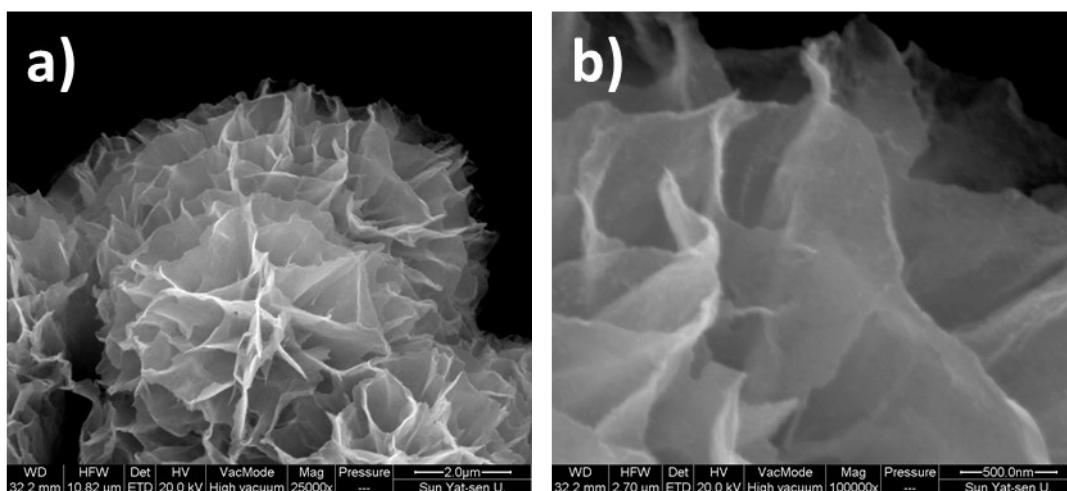

**Figure S13.** SEM images of porous MoNi<sub>4</sub> networks annealed at 450°C after the HER stability test.

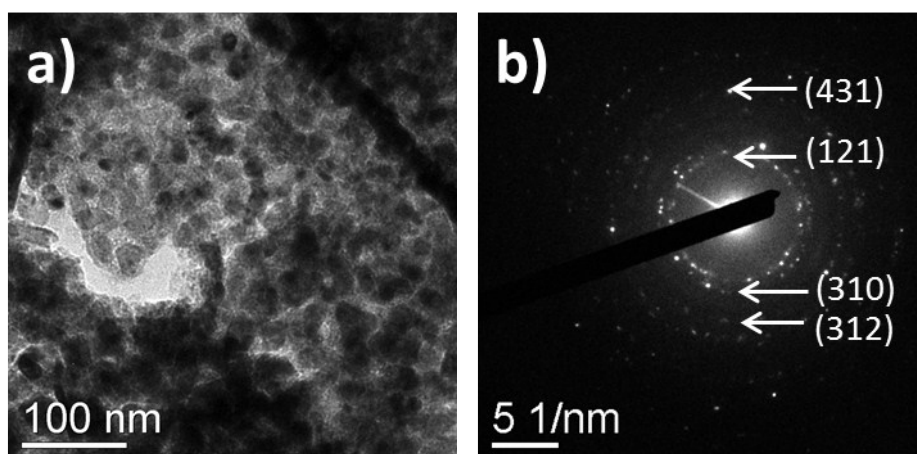

**Figure S14.** (a) TEM images and (b) the corresponding selected-area electron diffraction (SAED) pattern of porous MoNi<sub>4</sub> networks annealed at 450°C after the HER stability test.

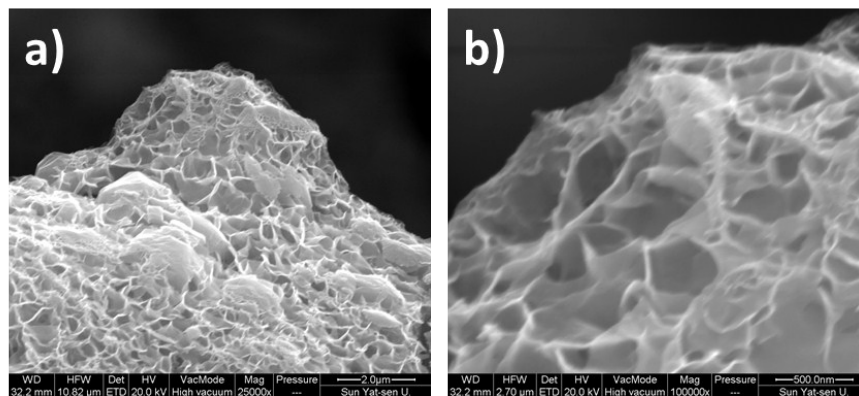

**Figure S15.** SEM images of porous MoNi<sub>4</sub> networks annealed at 450°C after the OER stability test.

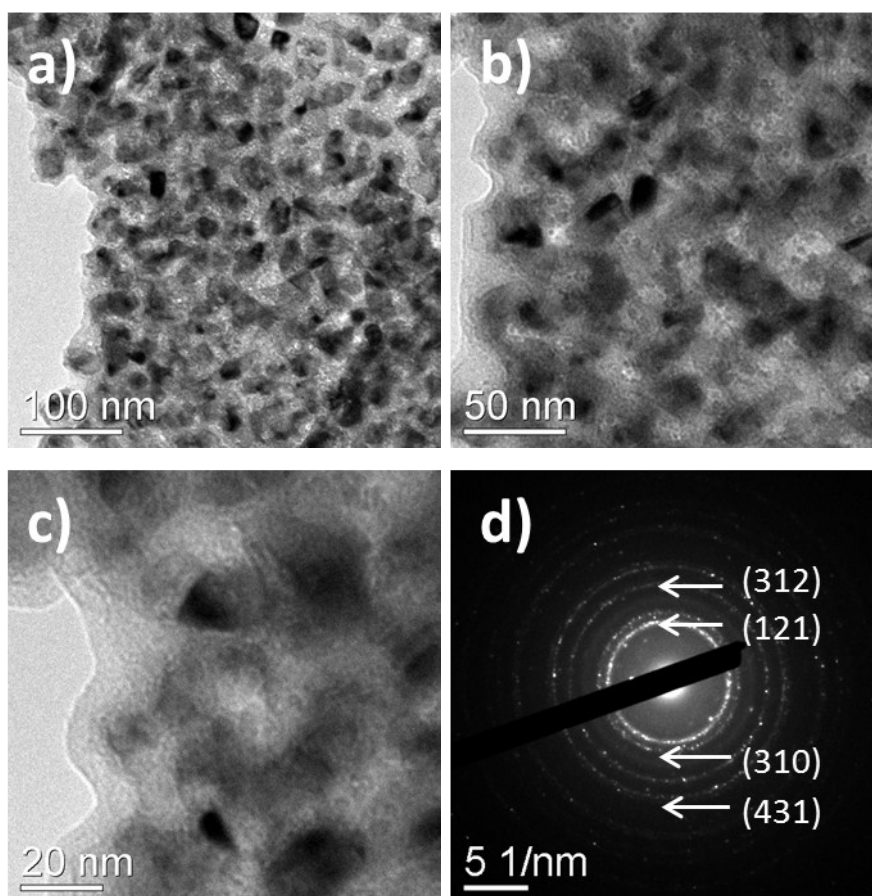

**Figure S16.** (a-c) TEM images and (d) the corresponding selected-area electron diffraction (SAED) pattern of the porous MoNi<sub>4</sub> networks annealed at 450°C after the OER stability test.

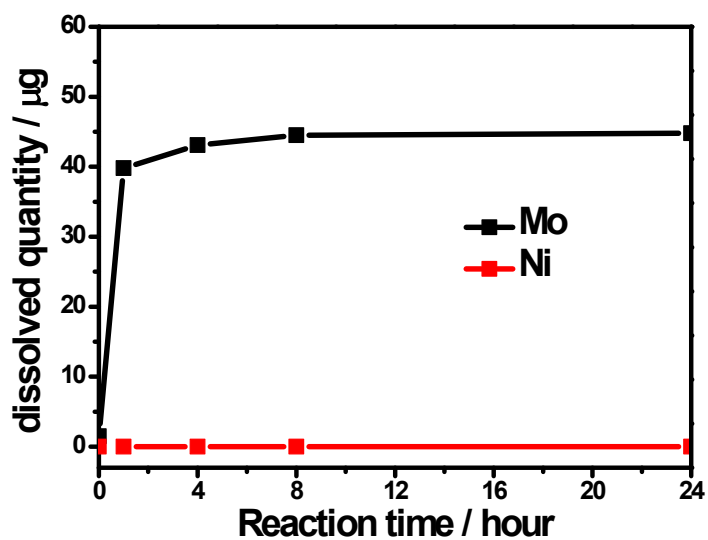

Figure S17. Dissolved quantity - time curves of Mo and Ni during OER.

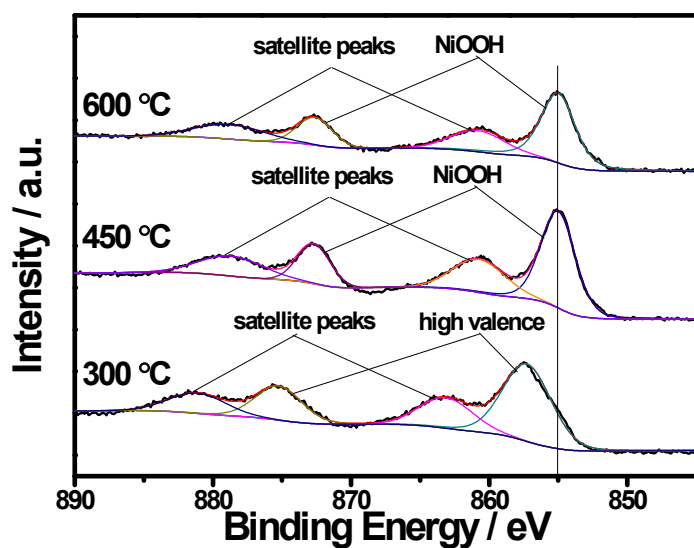

Figure S18. XPS spectra (Ni 2p peaks) of the MoNi<sub>4</sub> networks annealed at different temperature after OER.

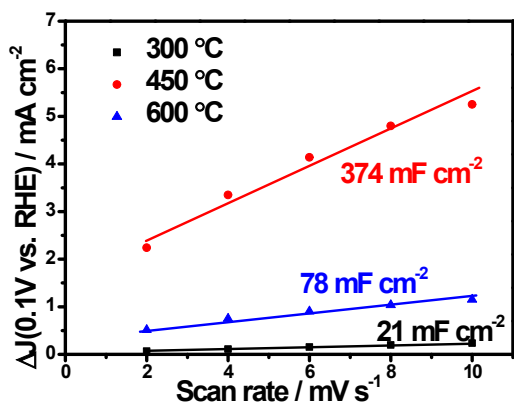

**Figure S19.** Electrochemically surface area measurements. The corresponding  $j_{\text{geo}}$  vs scan rates plots of the porous  $\text{MoNi}_4$  networks annealed at  $450^\circ\text{C}$ .

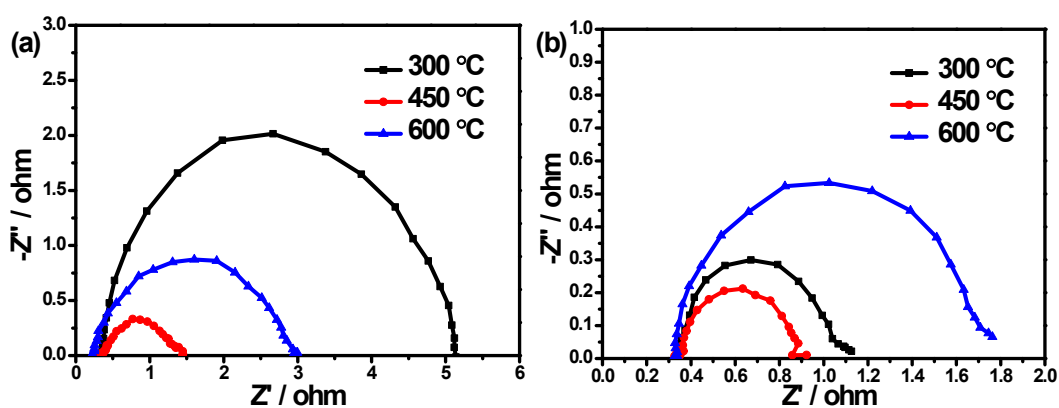

**Figure S20.** The Nyquist plots of the porous  $\text{MoNi}_4$  networks annealed at  $450^\circ\text{C}$  at (a)  $-100\text{ mV vs. RHE}$  and (b)  $1.6\text{ V vs. RHE}$ . All of the potentials and voltages are without  $iR$  corrected.

## **References**

- [1] X. Gao, H. Zhang, Q. Li, X. Yu, Z. Hong, X. Zhang, C. Liang, Z. Lin, *Angew. Chem. Int. Ed.* 55 (2016) 6290–6294.
- [2] C. Tang, N. Cheng, Z. Pu, W. Xing, X. Sun, *Angew. Chem. Int. Ed.* 54 (2015) 9351-9355.
- [3] M. Ledendecker, S. K. Calderón, C. Papp, H. Steinrück, M. Antonietti, M. Shalom, *Angew. Chem. Int. Ed.* 127 (2015) 12538-12542.
- [4] L.-A. Stern, L. Feng, F. Song, X. Hu, *Energy Environ. Sci.* 8 (2015) 2347-2351.
- [5] N. Jiang, B. You, M. Sheng, Y. Sun, *Angew. Chem. Int. Ed.* 54 (2015) 6251-6254.
- [6] Y. Yang, H. Fei, G. Ruan, J. M. Tour, *Adv. Mater.* 27 (2015) 3175-3180.
- [7] L.-L. Feng, G. Yu, Y. Wu, G.-D. Li, H. Li, Y. Sun, T. Asefa, W. Chen, X. Zou, *J. Am. Chem. Soc.* 137 (2015) 14023-14026.
- [8] H. Wang, H. Lee, Y. Deng, Z. Lu, P. Hsu, Y. Liu, D. Lin, Y. Cui, *Nat. Comm.* 6 (2015) 7261.
